# Supplementary material
Source: PubMed Central journal article supplement (PMC2980357)
Supplement: tables.pdf [file tables.pdf]

**Supplemental Figure 1. Insulin and C-peptide responses for a representative subject during intravenous glucose tolerance testing before and following gastric bypass surgery.**

Plasma insulin and C-peptide concentrations during the first 20 minutes of the intravenous glucose tolerance testing are plotted for a representative subject who had type 2 diabetes mellitus at before surgery (baseline, solid squares) and at 1 (open circles), 6 (open triangles) and 24 months (cross-hatched squares) following surgery.

**Supplement Table 1. Anthropometric and glycemic responses during 24 months following roux-en-y gastric bypass.** Body mass index (BMI, kg/m<sup>2</sup>), body weight (kg), body fat mass (kg), waist circumference (cm), fasting plasma glucose (mmol/L), insulin (mU/L) and the homeostasis model assessment of insulin resistance (HOMA-IR) were determined in 15 subjects with normal glycemia (n=8) and hyperglycemia (n=7) who were measured during 24 months, following roux-en-y gastric bypass surgery. \*, p < 0.05, †, p < 0.01, and ‡, depicts p < 0.005 compared to baseline.

|                          |                 | Baseline  | 1month     | Δ1 month  | 6 month    | Δ6 month  | 24 month  | Δ24 month |
|--------------------------|-----------------|-----------|------------|-----------|------------|-----------|-----------|-----------|
| BMI (kg/m <sup>2</sup> ) | Normal Glycemia | 47.4±1.2  | 43.4±1.5*  | -4.0±0.5  | 33.9±1.3‡  | -13.5±0.5 | 28.9±2.3‡ | -18.5±1.8 |
|                          | Hyperglycemia   | 49.8±1.6  | 45.3±1.6*  | -4.6±0.4  | 37.2±2.4‡  | -12.6±1.3 | 33.5±2.6‡ | -16.2±1.6 |
| Body weight              | Normal Glycemia | 127.2±3.7 | 116.4±3.9* | -10.8±1.4 | 91.1±3.8‡  | -36.1±1.4 | 77.9±6.4‡ | -49.3±4.2 |
|                          | Hyperglycemia   | 126.0±4.2 | 114.5±4.4* | -11.5±1.0 | 94.3±6.6‡  | -31.8±3.0 | 85.1±7.2‡ | -40.6±3.8 |
| Body fat mass            | Normal Glycemia | 71.4±3.1  | 63.4±3.2*  | -8.0±1.8  | 39.9±2.9‡  | -31.6±1.5 | 29.8±4.7‡ | -41.6±3.8 |
|                          | Hyperglycemia   | 74.5±3.1  | 64.4±2.9†  | -10.1±1.3 | 47.1±5.4‡  | -27.4±3.5 | 40.6±6.5‡ | -33.9±5.3 |
| Waist                    | Normal          | 139.4±5.1 | 134.2±5.5  | -5.2±1.7  | 114.6±5.1‡ | -24.8±2.1 | 92.7±6.1‡ | -46.7±2.9 |

|                    |               |            |            |            |            |            |            |             |
|--------------------|---------------|------------|------------|------------|------------|------------|------------|-------------|
| Circumference (cm) | Glycemia      |            |            |            |            |            |            |             |
|                    | Hyperglycemia | 137.7±6.5  | 132.1±5.7  | -5.6±2.6   | 117.6±6.9‡ | -20.1±3.1  | 103.9±6.6‡ | -33.9±2.2   |
| Glucose (mmol/L)   | Normal        | 4.61±0.20a | 3.94±0.15  | -0.67±0.17 | 4.00±0.12  | -0.61±0.17 | 4.18±0.15  | -0.44±0.22  |
|                    | Hyperglycemia | 6.61±0.25b | 4.91±0.51‡ | -1.70±0.39 | 4.63±0.35‡ | -1.98±0.33 | 4.27±0.48‡ | -2.34±0.46  |
| Hemoglobin A1c (%) | Normal        | 5.2±0.2    | 4.9±0.3    | -0.1±0.2   | 4.9±0.2    | -0.1±0.1   | 5.5±0.1    | -0.2±0.0    |
|                    | Hyperglycemia | 8.5±1.4    | 7.1±0.6    | 1.6±1.0    | 5.9±0.3    | 2.5±1.7    | 5.7±0.4    | 2.7±1.5     |
| Insulin (mU/L)     | Normal        | 13.13±1.46 | 6.25±1.33‡ | -6.88±1.59 | 3.81±0.73‡ | -9.31±1.72 | 3.01±0.60‡ | -10.12±1.31 |
|                    | Hyperglycemia | 13.71±1.41 | 8.29±1.29‡ | -5.43±1.22 | 7.16±1.93‡ | -6.55±1.55 | 5.81±1.86‡ | -7.9±1.63   |
| HOMA-IR            | Normal        | 2.69±0.31  | 1.09±0.24‡ | -1.60±0.32 | 0.70±0.15‡ | -1.99±0.36 | 0.56±0.12‡ | -2.12±0.29  |
|                    | Hyperglycemia | 4.10±0.54  | 1.96±0.54‡ | -2.14±0.47 | 1.63±0.63‡ | -2.47±0.56 | 1.34±0.67‡ | -2.76±0.60  |

**Supplemental Table 2. Indices of insulin secretion and insulin sensitivity at baseline and during 24 months weight loss following roux-en-y gastric bypass surgery.**

The acute insulin response to glucose, AIRg, ( $\text{uU}\cdot\text{ml}^{-1}\cdot\text{min}^{-1}$ ), beta-cell function, DI, and peripheral insulin sensitivity, Si, ( $\text{min}^{-1}\cdot\mu\text{U}^{-1}\cdot\text{ml}^{-1}$ ) were measured as described in **Methods**. Changes over 24 months ( $n = 15$ ) following surgical intervention were measured in patients who exhibited normal glycemia ( $n = 8$ ) and those with glycemic disorders ( $n=7$ ) at baseline; \* $P < 0.05$  and ‡ $P < 0.01$  vs. baseline; values with different letters are significantly different compared to the normal glycemia group,  $p < 0.05$ .

|      | Baseline        |               | 1 month         |               | 6 month         |               | 24 month        |               |
|------|-----------------|---------------|-----------------|---------------|-----------------|---------------|-----------------|---------------|
|      | Normal glycemia | Hyperglycemia |
| AIRg | 808±160a        | 36±11b        | 935±336a        | 158±66b       | 443±59          | 245±70        | 400±68          | 243±65        |
| Si   | 1.65±0.19       | 2.01±0.33     | 1.51±0.42       | 2.18±0.52     | 2.49±0.26       | 2.86±0.56     | 5.26±0.89‡      | 4.21±0.71*    |
| DI   | 1150±132a       | 63±21b        | 900±175         | 333±121       | 1150±190        | 555±101       | 1830±309*       | 985±242‡      |
