# Supplementary material
Source: PubMed Central journal article supplement (PMC2980357)

Supplement Figure 1

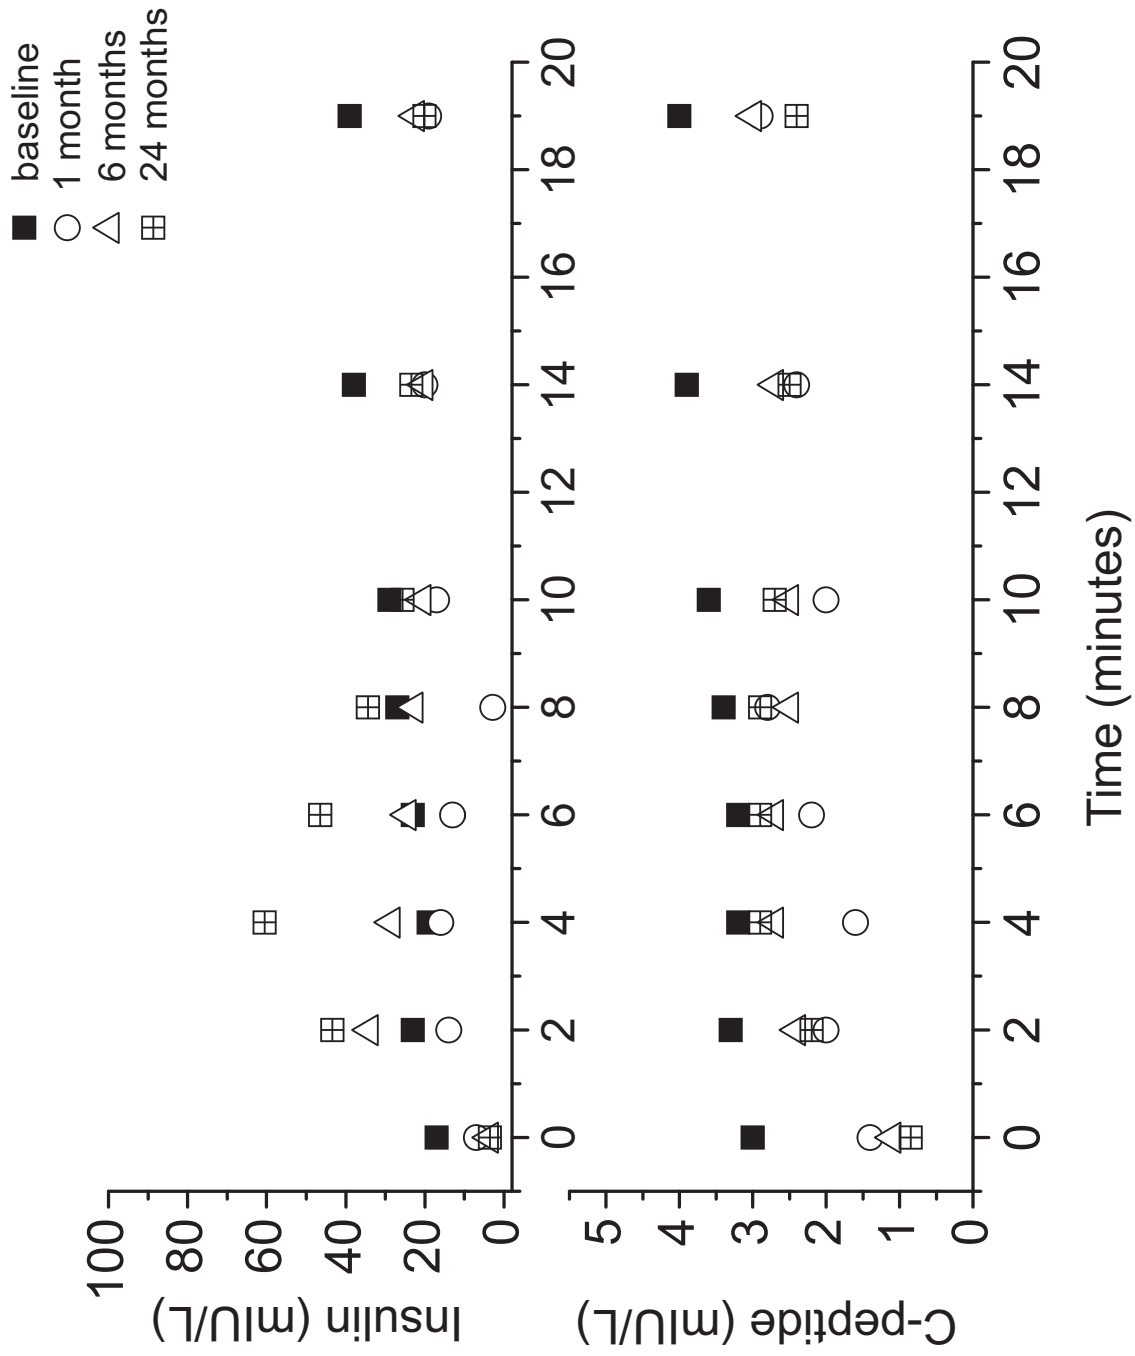

Supplement: fig.pdf [file fig.pdf]
